# Supplementary material
Source: Springer Nature journal article supplement (https://www.springermedizin.de/resource/supplementary/12968_2010_976_MOESM3_ESM.pdf/9580080)

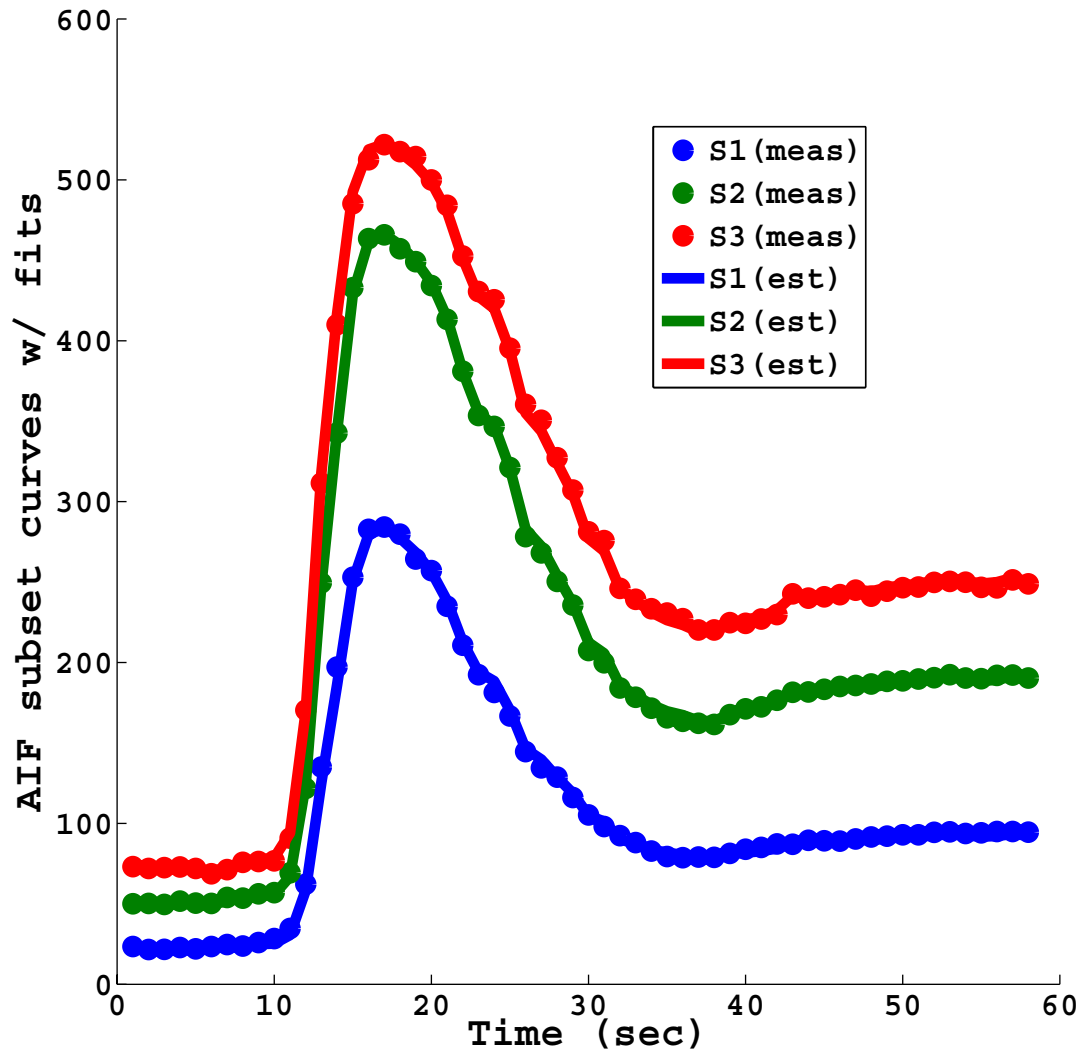

Supplement: MOESM3 [file 9580080]
